# Supplementary material
Source: publisher figshare collection journal article supplement (https://acs.figshare.com/ndownloader/files/4144147)
Supplement: Supplementary file 1 [file 4144147]

Table S1. Results of a two-way ANOVA of the effect of compounds, nutritional condition (starved and non-starved) and their interaction on the attractiveness of the reproductive *B. xylophilus*

| Factor               | df | <i>F</i> | <i>p</i> |
|----------------------|----|----------|----------|
| 24 h                 |    |          |          |
| Compound             | 18 | 29.21    | <0.0001  |
| Nutrition            | 1  | 4.68     | 0.03     |
| Compound × Nutrition | 18 | 6.90     | <0.0001  |
| 48 h                 |    |          |          |
| Compound             | 18 | 38.01    | <0.0001  |
| Nutrition            | 1  | 0.80     | 0.37     |
| Compound × Nutrition | 18 | 5.82     | <0.0001  |

Table S2. Results of a two-way ANOVA of the effect of compounds, matrices and their interaction on trapping *B. xylophilus*

| Effects           | df | <i>F</i> | <i>p</i> |
|-------------------|----|----------|----------|
| 24 h              |    |          |          |
| Compounds         | 3  | 65.10    | <0.0001  |
| Matrices          | 1  | 224.15   | <0.0001  |
| Compound × Matrix | 3  | 30.45    | <0.0001  |
| 48 h              |    |          |          |
| Compounds         | 3  | 61.61    | <0.0001  |
| Matrices          | 1  | 10.02    | 0.006    |
| Compound × Matrix | 3  | 7.82     | 0.002    |

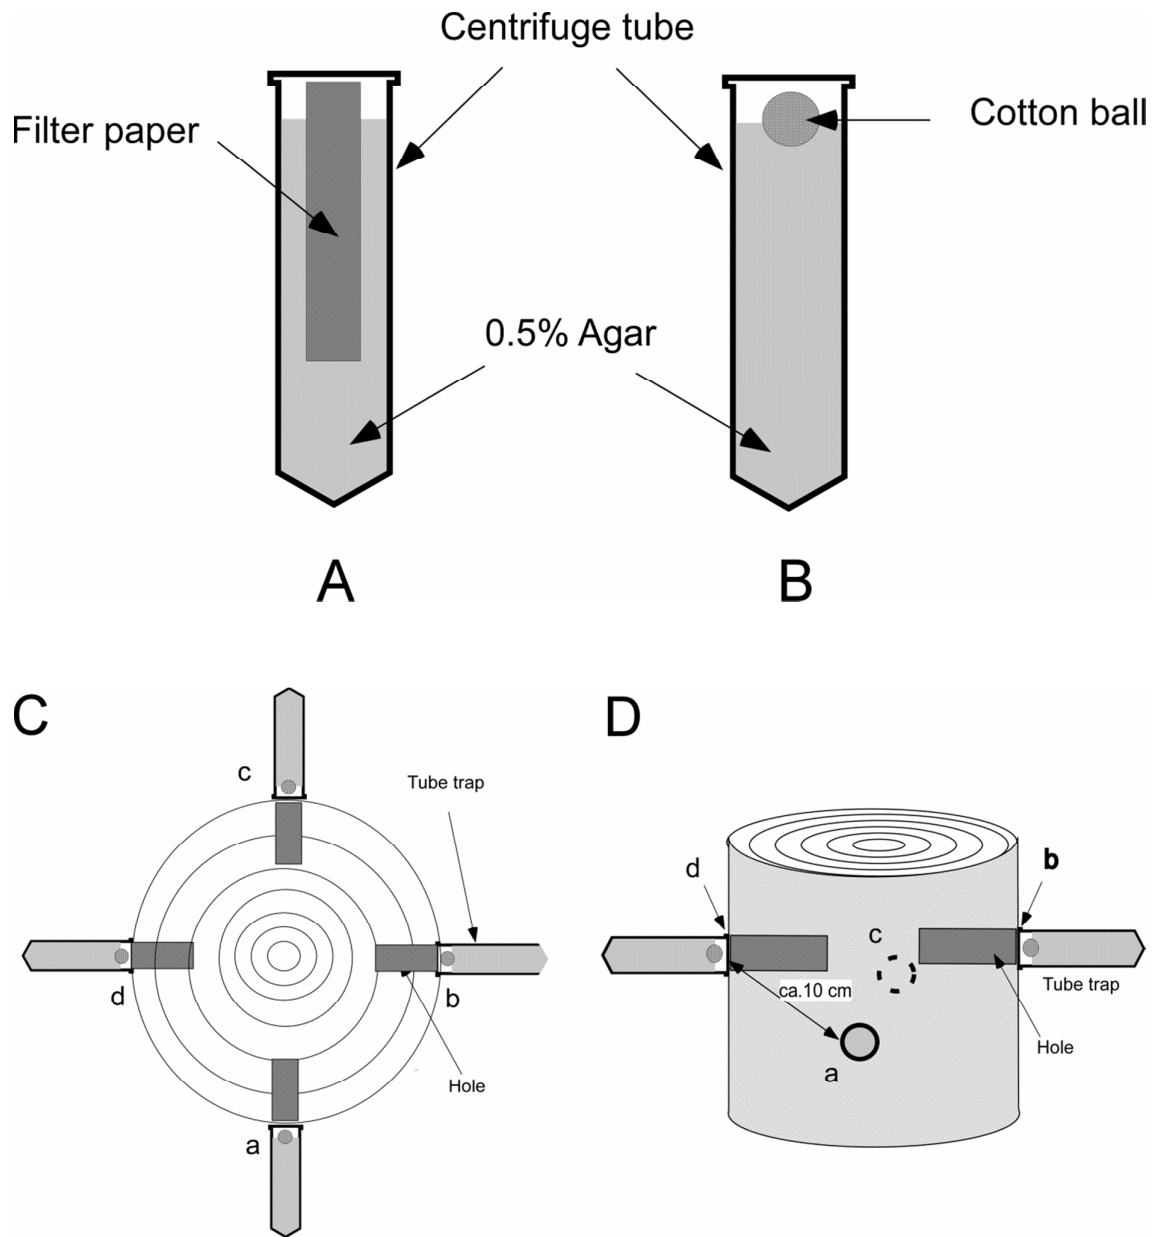

Figure S1. Tube trap design, (A and B), and sampling method for 'PWN infected pine tree log bioassay'. Tube traps were inserted at holes a, b, c, and d. (C; Top view, D; side view).
